# Supplementary material
Source: PubMed Central journal article supplement (PMC5462487)
Supplement: ar6b00553_si_001.pdf [file ar6b00553_si_001.pdf]

## Self-Assembling Multidomain Peptide Nanofibers for Delivery of Bioactive Molecules and Tissue Regeneration

Amanda N. Moore and Jeffrey D. Hartgerink

Department of Chemistry and Bioengineering, Rice University, 6500 Main Street, Houston, Texas 77005, United States

**SI Table 1. Published Multidomain Peptide Sequences**

| <i>Peptide Sequence</i>                                                             | <i>Reference</i>                          | <i>Designed Bioactivity</i>              |
|-------------------------------------------------------------------------------------|-------------------------------------------|------------------------------------------|
| (QL) <sub>6</sub>                                                                   | 11                                        | N/A                                      |
| K(QL) <sub>6</sub> K                                                                | 11                                        | N/A                                      |
| K <sub>2</sub> (QL) <sub>2</sub> K <sub>2</sub>                                     | 11                                        | N/A                                      |
| K <sub>2</sub> (QL) <sub>3</sub> K <sub>2</sub>                                     | 11                                        | N/A                                      |
| K <sub>2</sub> (QL) <sub>4</sub> K <sub>2</sub>                                     | 11                                        | N/A                                      |
| K <sub>2</sub> (QL) <sub>5</sub> K <sub>2</sub>                                     | 11                                        | N/A                                      |
| K <sub>2</sub> (QL) <sub>6</sub> K <sub>2</sub>                                     | 11, 12, 21, 14                            | N/A                                      |
| K <sub>3</sub> (QL) <sub>6</sub> K <sub>3</sub>                                     | 11                                        | N/A                                      |
| K <sub>4</sub> (QL) <sub>6</sub> K <sub>4</sub>                                     | 11                                        | N/A                                      |
| K <sub>2</sub> (QF) <sub>6</sub> K <sub>2</sub>                                     | 14                                        | N/A                                      |
| K <sub>2</sub> (QFQL) <sub>3</sub> K <sub>2</sub>                                   | 14                                        | N/A                                      |
| K <sub>2</sub> (QW) <sub>6</sub> K <sub>2</sub>                                     | 14                                        | N/A                                      |
| K <sub>2</sub> (QY) <sub>6</sub> K <sub>2</sub>                                     | 14                                        | N/A                                      |
| K <sub>2</sub> (SL) <sub>6</sub> K <sub>2</sub>                                     | 12, 13, 16, 21, 23,<br>29, 31             | N/A                                      |
| K <sub>2</sub> (TL) <sub>6</sub> K <sub>2</sub>                                     | 13                                        | N/A                                      |
| E(QL) <sub>6</sub> E                                                                | 12                                        | N/A                                      |
| E(SL) <sub>6</sub> E                                                                | 12                                        | N/A                                      |
| E <sub>2</sub> (SL) <sub>6</sub> E <sub>2</sub>                                     | 21                                        | N/A                                      |
| E(CL <sub>3</sub> SL) <sub>3</sub> E                                                | 12                                        | N/A                                      |
| K <sub>2</sub> (SL) <sub>2</sub> SA(SL) <sub>3</sub> K <sub>2</sub>                 | 29                                        | N/A                                      |
| K <sub>2</sub> (SL) <sub>2</sub> (SA) <sub>2</sub> (SL) <sub>2</sub> K <sub>2</sub> | 29                                        | N/A                                      |
| E <sub>2</sub> (SL) <sub>6</sub> E <sub>2</sub> GRGDS                               | 17, 27                                    | cell adhesion                            |
| K(SL) <sub>3</sub> RG(SL) <sub>3</sub> KGRGDS                                       | 13, 16, 19, 20, 23,<br>24, 25, 26, 28, 31 | cell adhesion & enzymatic<br>degradation |
| K(TL) <sub>2</sub> SLRG(TL) <sub>3</sub> KGRGDS                                     | 13                                        | cell adhesion & enzymatic<br>degradation |
| K <sub>2</sub> (SL) <sub>6</sub> K <sub>2</sub> GRGDS                               | 13, 16                                    | cell adhesion                            |
| K <sub>2</sub> (TL) <sub>6</sub> K <sub>2</sub> GRGDS                               | 13                                        | cell adhesion                            |
| K(SL) <sub>3</sub> RG(SL) <sub>3</sub> K                                            | 16, 30,31                                 | enzymatic degradation                    |
| K <sub>2</sub> (SL) <sub>3</sub> RG(SL) <sub>3</sub> K <sub>2</sub>                 | 16                                        | enzymatic degradation                    |
| K(SL) <sub>3</sub> RG(SL) <sub>3</sub> KGKLTWQELYQLKYKGI                            | 30, 31                                    | enzymatic degradation &<br>angiogenesis  |

**SI Table 2. Cell and Tissue Culture using Multidomain Peptides**

| <i>Cell Type Used</i>            | <i>Peptide(s) examined</i>                               | <i>Culture system</i>   | <i>Reference</i> |
|----------------------------------|----------------------------------------------------------|-------------------------|------------------|
| SHED                             | K <sub>2</sub> (SL) <sub>6</sub> K <sub>2</sub>          | 2D/3D                   | 13, 16           |
|                                  | K <sub>2</sub> (SL) <sub>6</sub> K <sub>2</sub> GRGDS    |                         |                  |
|                                  | K(SL) <sub>3</sub> RG(SL) <sub>3</sub> K                 |                         |                  |
|                                  | K(SL) <sub>3</sub> RG(SL) <sub>3</sub> KGRGDS            |                         |                  |
|                                  | K <sub>2</sub> (TL) <sub>6</sub> K <sub>2</sub>          |                         |                  |
| DPSC                             | K <sub>2</sub> (TL) <sub>6</sub> K <sub>2</sub> GRGDS    | 2D/3D                   | 25               |
|                                  | K(TL) <sub>2</sub> SLRG(TL) <sub>3</sub> KGRGDS          |                         |                  |
|                                  | K(SL) <sub>3</sub> RG(SL) <sub>3</sub> KGRGDS            |                         |                  |
| hMSCs                            | K <sub>2</sub> (SL) <sub>6</sub> K <sub>2</sub>          | 2D                      | 31               |
|                                  | K(SL) <sub>3</sub> RG(SL) <sub>3</sub> KGRGDS            |                         |                  |
| HUVEC                            | K(SL) <sub>3</sub> RG(SL) <sub>3</sub> KGKLTWQELYQLKYKGI | 2D                      | 30, 31           |
|                                  | K(SL) <sub>3</sub> RG(SL) <sub>3</sub> KGRGDS            |                         |                  |
| THP-1                            | K(SL) <sub>3</sub> RG(SL) <sub>3</sub> KGKLTWQELYQLKYKGI | 2D                      | 19, 23           |
|                                  | K <sub>2</sub> (SL) <sub>6</sub> K <sub>2</sub>          |                         |                  |
| <i>Ex vivo</i><br>mandible slice | K(SL) <sub>3</sub> RG(SL) <sub>3</sub> KGRGDS            | organ culture           | 20               |
| Whole blood                      | K(SL) <sub>3</sub> RG(SL) <sub>3</sub> KGRGDS            | blood clotting<br>model | 26               |

**SI Table 3. *In Vivo* Studies of Multidomain Peptides**

| <i>Model</i>                              | <i>Peptide(s) examined</i>                               | <i>Reference(s)</i> |
|-------------------------------------------|----------------------------------------------------------|---------------------|
| Subcutaneous injection                    | K(SL) <sub>3</sub> RG(SL) <sub>3</sub> KGRGDS            | 19, 23, 28, 31      |
|                                           | K(SL) <sub>3</sub> RG(SL) <sub>3</sub> K                 |                     |
| Hind Limb Ischemia                        | K(SL) <sub>3</sub> RG(SL) <sub>3</sub> K                 | 30                  |
|                                           | K(SL) <sub>3</sub> RG(SL) <sub>3</sub> KGKLTWQELYQLKYKGI |                     |
| Perioperative bleeding:<br>Liver Incision | K(SL) <sub>3</sub> RG(SL) <sub>3</sub> KGRGDS            | 26                  |

**SI Table 4. Delivery of Bioactive Molecules using Multidomain Peptides**

| <i>Molecule</i> | <i>Reference</i> |
|-----------------|------------------|
| hESC secretome  | 17               |
| Suramin         | 19               |
| MCP-1           | 23, 24           |
| IL-4            | 23               |
| EGF             | 24               |
| PlGF-1          | 24, 28           |
| TGF $\beta$ 1   | 25               |
| FGF2            | 25               |
| VEGF            | 25               |
| Batroxobin      | 26               |
| SN-38           | 29               |
| Diflunisal      | 29               |
| Etodolac        | 29               |
| Daunorubicin    | 29               |
| Levofloxacin    | 29               |
| Norfloxacin     | 29               |
| VEGF            | 31               |

All reference numbers refer to citations in the main text.
